# Supplementary material
Source: publisher site journal article supplement (https://www.dovepress.com/article/244453)
Supplement: Supplementary file 1 [file get_supplementary_file.php]

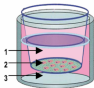

1 Medium with 1% FBS

2 HU-MSCs or SCIOPs

3 Medium with 10% FBS

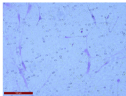

**0  $\mu\text{g}/\text{ml}$**

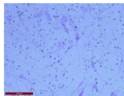

**12.5  $\mu\text{g}/\text{ml}$**

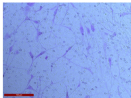

**25  $\mu\text{g}/\text{ml}$**

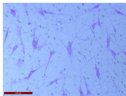

**50  $\mu\text{g}/\text{ml}$**

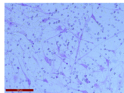

**100  $\mu\text{g}/\text{ml}$**

**DAPI****CM-Dil****Merge****HU-MSCs**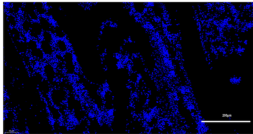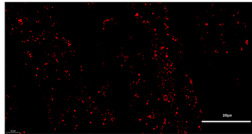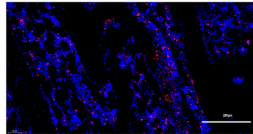**SCIOPs**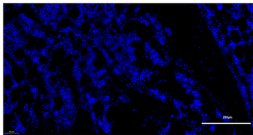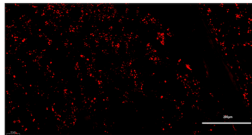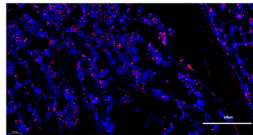**SCIOPs+MF**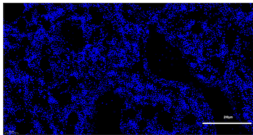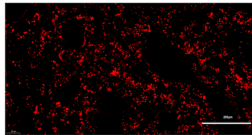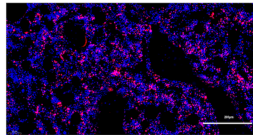

**Control****GC****Hu-MSCs****MIOPs****MIOPs+MF****Heart**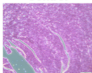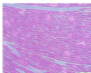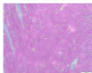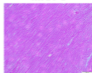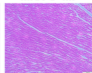**Liver**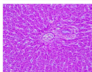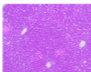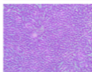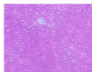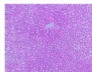**Spleen**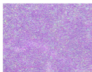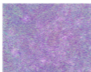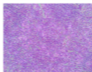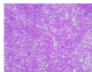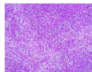**Lungs**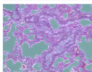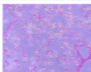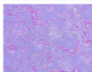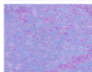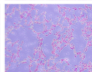**Kidney**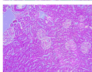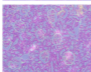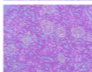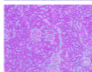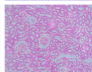

**Figure. S1.** Effect of SPION@PDA NPs on the migration of MSCs *in vitro*. The migration of the MSCs labeled with various concentrations (0, 12.5, 25, 50, and 100 µg/mL) of NPs for 24 h. MSCs passed through the inserts were dyed by H&E staining. Scale bar = 100 µm.

**Figure. S2.** CM-Dil marked MSCs, the immunofluorescence in HU-MSCs, SCIOPs, and SCIOPs+ MF groups. (Scale bar = 200 µm.)

**Figure. S3.** H&E staining of the heart, liver, lungs, kidney, and spleen (third month) in Control, GC, HU-MSCs, SCIOPs, and SCIOPs+ MF groups. (Scale bar = 100 µm. H&E, hematoxylin and eosin.)
